# Supplementary material for: Membrane-immobilized gemcitabine for cancer-targetable NK cell surface engineering
Source: Royal Society of Chemistry journal article supplement (doi:10.1039/d4tb01639d), 2024-01-01
Supplement: d4tb01639d1.pdf [file d4tb01639d1.pdf]

# 1 Supporting Information

## 2 Membrane-immobilized Gemcitabine for Cancer- 3 Targetable NK cell Surface Engineering

4 Kyung Mu Noh<sup>a</sup>, Ashok Kumar Jangid<sup>a</sup>, Jaewon Park<sup>a</sup>, Sungjun Kim<sup>a</sup>, and Kyobum Kim<sup>a,\*</sup>

5 <sup>a</sup>Department of Chemical & Biochemical Engineering, Dongguk University, Seoul 04620,  
6 Republic of Korea.

7 \* Corresponding authors:

8 [kyobum.kim@dongguk.edu](mailto:kyobum.kim@dongguk.edu) (K. Kim).

9

10

11

12

13

14

15

16

17

18

19

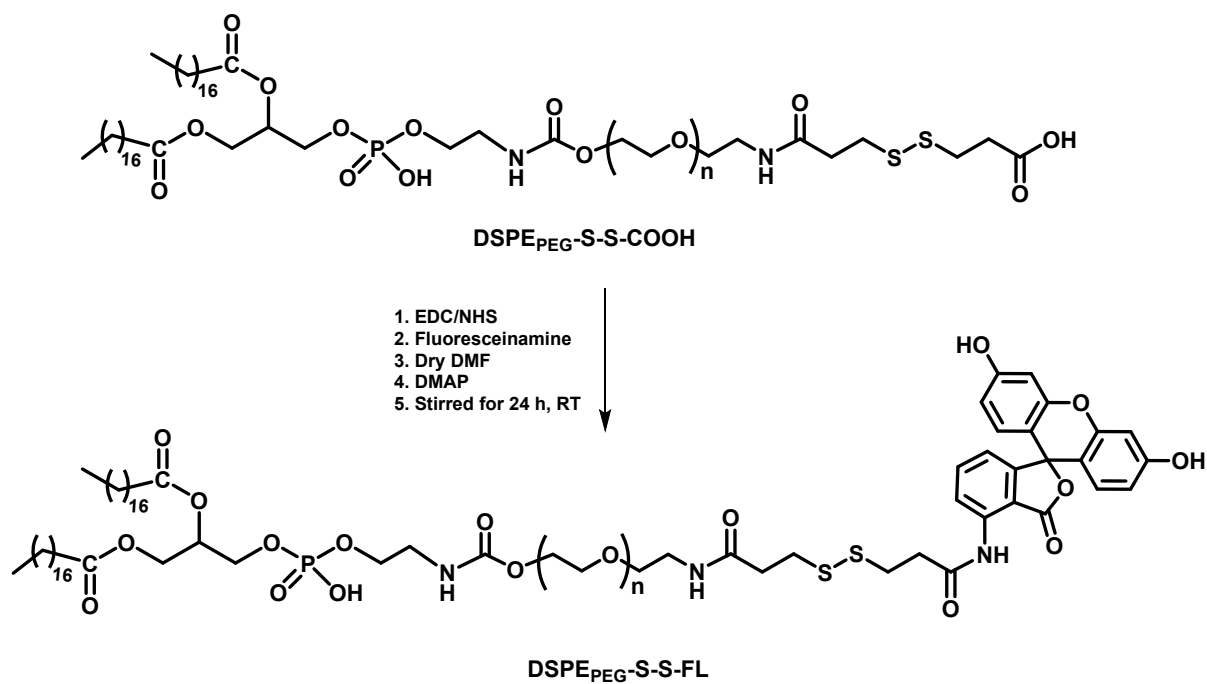

20

21 **Fig. S1** Reaction scheme represents the synthesis of  $\text{DSPE}_{\text{PEG}}\text{-S-S-FL}$  conjugate for NK cell  
 22 surface coating analysis.

23

24

25

26

27

28

29

30

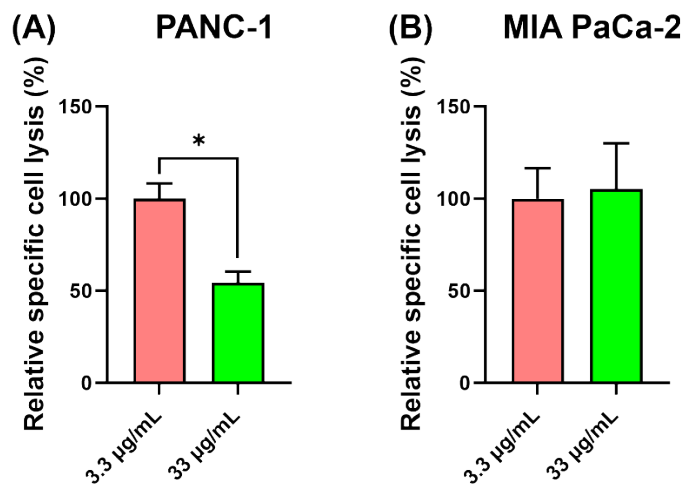

31

32 **Fig. S2 Relative specific cell lysis of GCNK cells co-cultured with pancreatic cancer cells**  
 33 **after 24 h.** GCNK cells were surface coated with 3.3 or 33 µg/mL of lipid-Gem conjugates.  
 34 The different target cancer cells (PANC-1 and MIA-PaCa-2) were co-cultured with 5:1 E:T  
 35 ratios of GCNK cells. Percent of anticancer functionality (A) PANC-1 and (B) MIA PaCa-2  
 36 cancer cells. \*  $p < 0.05$ .

37

38

39

40

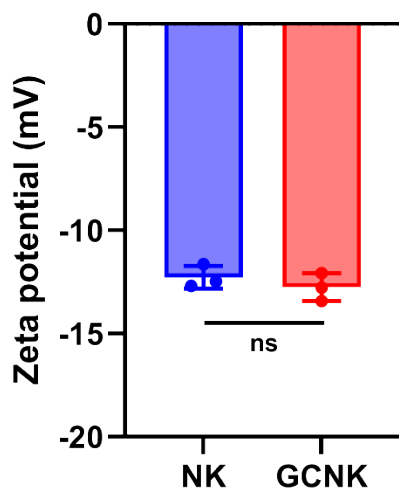

41

42 **Fig. S3 Zeta-potential measurements of NK and GCNK cells.** GCNK cells were surface  
 43 engineered with 3.3 µg/mL of lipid-Gem conjugates. “ns” indicates statistically non-  
 44 significant.

45

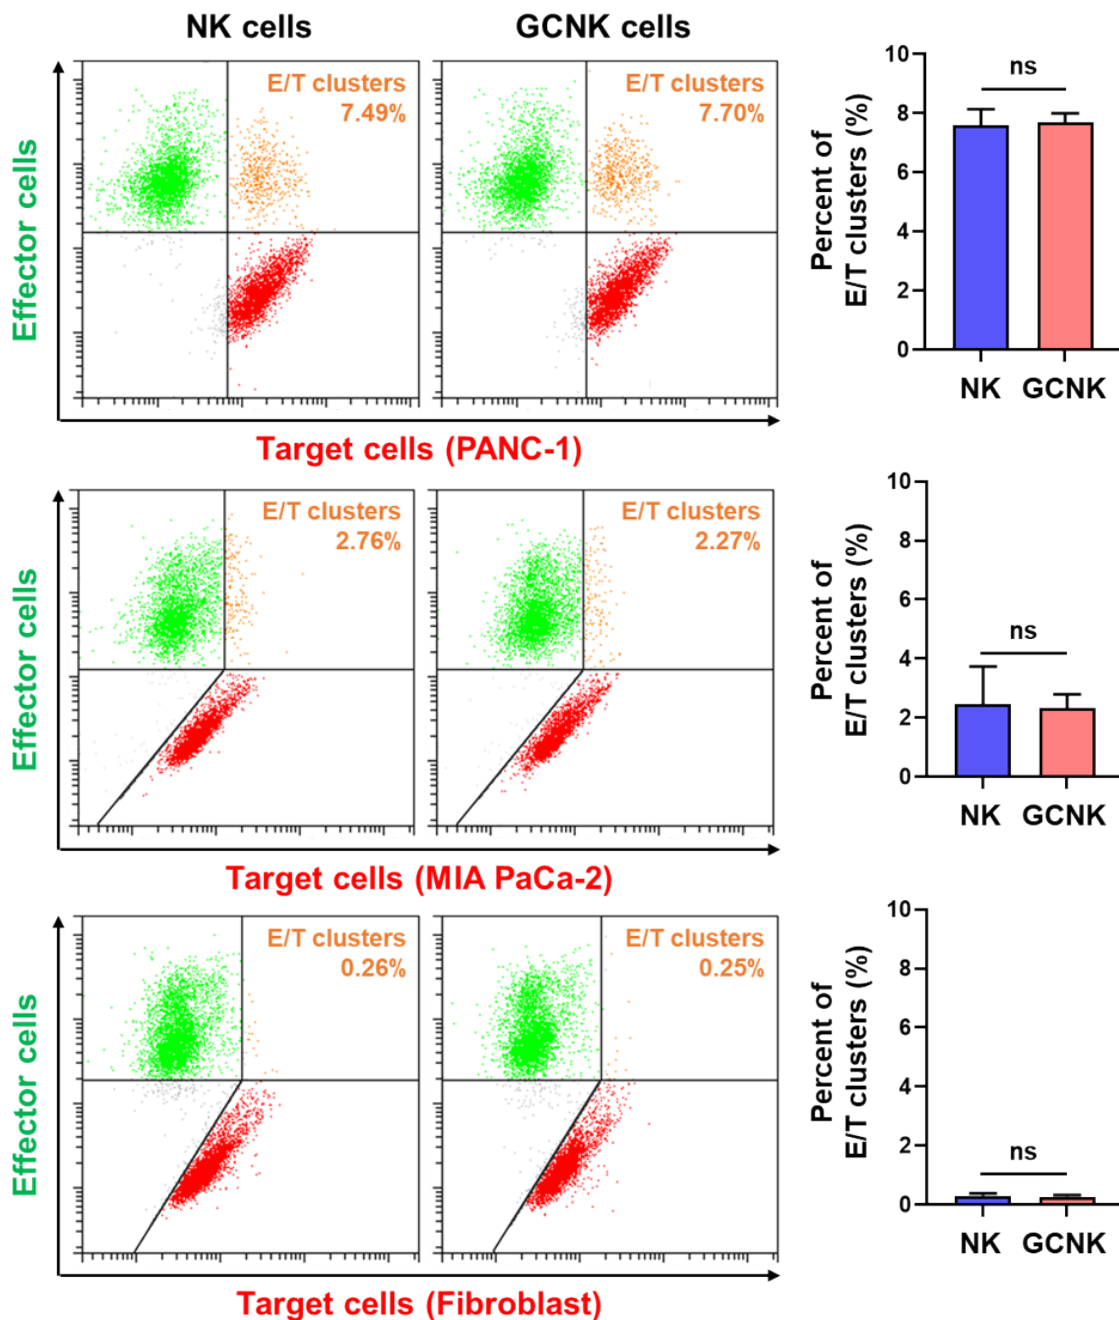

46

47 **Fig. S4 Effector/target (E/T) clusters involving effector cells (NK or GCNK cells) and**  
 48 **target cells (PANC-1, MIA PaCa-2, and fibroblasts).** NK cells and target cells were stained  
 49 with Calcein AM and CellTracker™ Red CMTPX Dye, respectively. Flow cytometry was used  
 50 to detect the E/T clusters emitting both green and red fluorescence. “ns” indicates that  
 51 statistically non-significant.

52

53

54

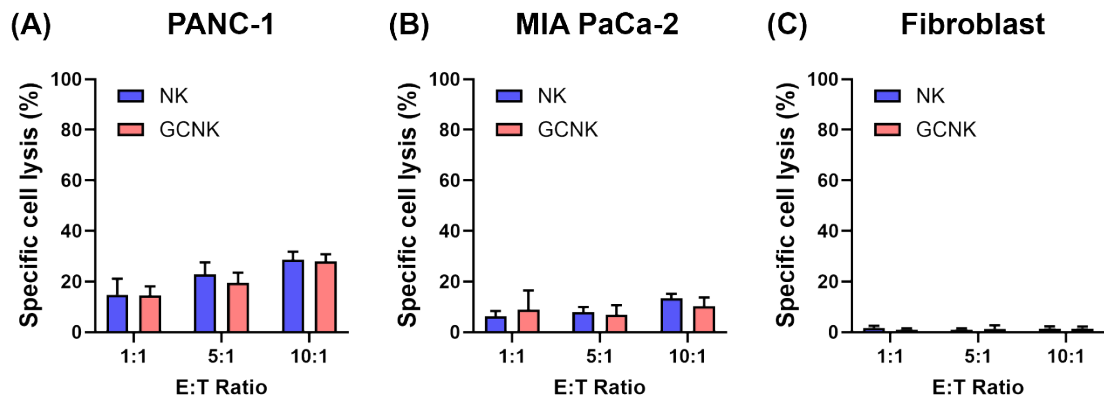

55

56 **Fig. S5 Anticancer efficacy of NK or GCNK cells co-cultured with pancreatic cancer cells**  
 57 **and normal fibroblasts after 4 h.** GCNK cells were surface engineered with 3.3  $\mu\text{g}/\text{mL}$  of  
 58 lipid-Gem conjugates. The different target cells (PANC-1, MIA-PaCa-2, and fibroblast) were  
 59 co-cultured with different E:T ratios of NK or GCNK cells. Percent specific cell lysis of (A)  
 60 PANC-1, (B) MIA-PaCa-2 cancer cells, and (C) normal fibroblasts.

61

62

63

64

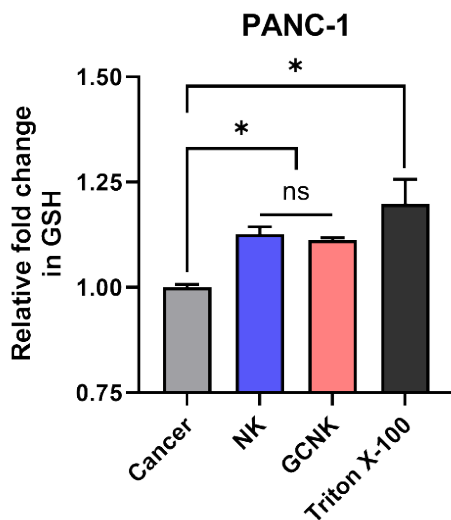

65

66 **Fig. S6 Quantification of GSH leakage from damaged target cells.** NK cells were co-  
 67 cultured with target cells at a 5:1 E:T ratio for 24 h and the amount of GSH released in the  
 68 collected supernatant was determined. Triton-X was used for the complete cancer cell  
 69 destruction group. \*  $p < 0.05$ . “ns” indicates statistically non-significant.

70
